# Supplementary material
Source: PubMed Central journal article supplement (PMC6059656)
Supplement: NIHMS981919-supplement-Supp_Info.pdf [file NIHMS981919-supplement-Supp_Info.pdf]

## SUPPORTING INFORMATION

### **Lithium Diisopropylamide: Nonequilibrium Kinetics and Lessons Learned About Rate Limitation**

Russell F. Algera, Lekha Gupta, Alexander C. Hoepker, Jun Liang, Yun Ma, Kanwal J. Singh, and David B. Collum\*

Department of Chemistry and Chemical Biology  
Baker Laboratory, Cornell University  
Ithaca, New York 14853-1301  
E-mail: dbc6@cornell.edu

|                                                                                                                                                                          |      |
|--------------------------------------------------------------------------------------------------------------------------------------------------------------------------|------|
| <b>I. Simulation Protocols</b>                                                                                                                                           | S-3  |
| Generic Scheme                                                                                                                                                           |      |
| <b>II. Simulations</b>                                                                                                                                                   |      |
| Figure 2. Saturation kinetics showing substrate-concentration-dependent and substrate-concentration-independent regions.                                                 | S-4  |
| Figure 4. Decays of substrate ArH according to eqs 5 and 6 assuming rate-limiting proton transfer and rate-limiting deaggregation.                                       | S-5  |
| Figure 5. Zeroth-order decays at various initial starting concentrations of ArH showing parallel decays and the onset of rate-limiting proton transfer.                  | S-6  |
| Figure 8. Varying degrees of autocatalysis superimposed on first-order decays.                                                                                           | S-7  |
| Figure 9. Simulation of catalysis showing first-order and second-order saturation kinetics.                                                                              | S-8  |
| Figure 10. Saturation behavior for LiX catalysts.                                                                                                                        | S-9  |
| Figure 11. Plot showing preferential metalation of ArH over ArD.                                                                                                         | S-10 |
| Figure 17. Simulated plots of concentration versus time for the reaction of <b>7</b> with lithium diisopropylamide in tetrahydrofuran at $-78\text{ }^{\circ}\text{C}$ . | S-11 |
| Figure 18. Simulations of plots showing concentration versus time for various initial concentrations of carbamate <b>7</b> .                                             | S-11 |
| Figure 19. Simulated time-dependent concentrations of ester, lithium diisopropylamide dimer, enolate homodimer, and mixed dimer.                                         | S-13 |
| Figure 22. Plot of initial rate versus LiCl concentration showing catalyzed inhibition, no change in rate, and catalyzed acceleration.                                   | S-15 |
| <b>III. Parallel versus Serial Barrier Order Dependence</b>                                                                                                              |      |
| Figure A. Order in LDA versus $\Delta G$ (parallel)                                                                                                                      | S-16 |
| Figure B. Order in LDA versus $\Delta G$ (series)                                                                                                                        | S-18 |
| <b>IV. Standard Steady State Treatment of Multiple Barriers in Series</b>                                                                                                | S-20 |
| <b>V. Arbitrary Height Barriers in Series</b>                                                                                                                            | S-23 |
| <b>VI. Full Reference 18</b>                                                                                                                                             | S-24 |

## I. Simulation Protocols

### Generic Scheme.

Assuming the generic scheme

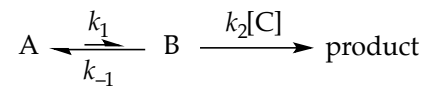

an expression for [B] at a steady state follows.

$$[B] = \frac{k_1[A]}{k_{-1} + k_2[C]}$$

From this expression one readily obtains the rate law for consumption of C.

$$-\frac{d[C]}{dt} = \frac{k_1 k_2 [A][C]}{k_{-1} + k_2 [C]}$$

## II. Simulations

All figures were generated in Igor Pro® using simulated data from Wolfram Mathematica®. Following each figure is a chemical scheme and demarcated Mathematica code that can be copied and directly executed to recreate the plots. The figure numbers correspond to those in the manuscript.

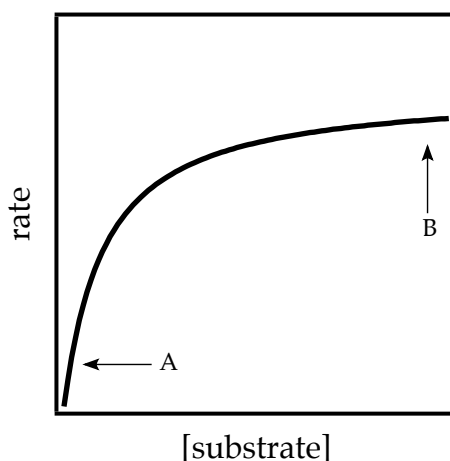

**Figure 2.** Saturation kinetics. A and B correspond to regions of substrate-concentration-dependent and substrate-concentration-independent regions.

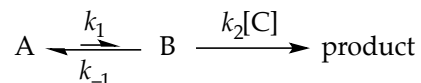

$$\frac{d[A]}{dt} = -k_1[A] + k_{-1}[B]$$

$$\frac{d[B]}{dt} = k_1[A] - k_{-1}[B] - k_2[B][C]$$

$$\frac{d[C]}{dt} = -k_2[B][C]$$

```
sol[k1_, kn1_, k2_, a0_, c0_] := NDSolve[{a'[t] == -k1*a[t] + kn1*b[t], b'[t] == k1*a[t] - kn1*b[t] - k2*b[t]*c[t], c'[t] == -k2*b[t]*c[t], a[0] == (a0 kn1)/(k1 + kn1), b[0] == (a0 k1)/(k1 + kn1), c[0] == c0}, {a, b, c}, {t, 0, 1000}]
```

```
Manipulate[Plot[-c[10] /. sol[k1, kn1, k2, a0, c0], {c0, 0, 0.1}, PlotRange -> {0, 0.0001}], {{k1, 0.001, "k1"}, 0, 10}, {{kn1, 1, "kn1"}, 0, 10}, {{k2, 1000, "k2"}, 0, 10}, {{a0, 0.1, "a0"}, 0, 10}, {{c0, 0.01, "c0"}, 0, 0.1}]
```

```
Export["table.xls", Table[-c[10] /. sol[0.001, 1, 100, 0.1, x], {x, 0, 0.1, 0.001}]]
```

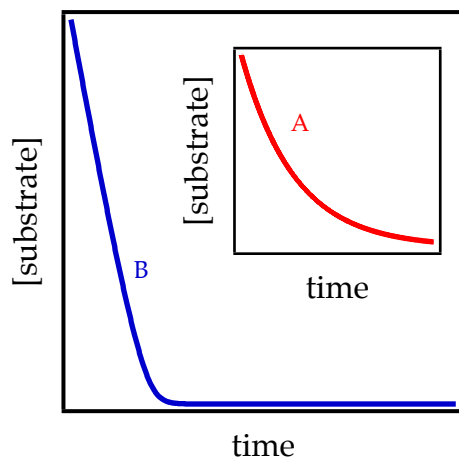

**Figure 4.** Decays of substrate ArH according to eqs 5 and 6 assuming rate-limiting proton transfer ( $k_2[\text{ArH}]/k_{-1} = 0.1$ ; curve A) and rate-limiting deaggregation ( $k_2[\text{ArH}]/k_{-1} = 10$ ; curve B).

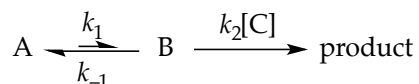

$$\frac{d[\text{A}]}{dt} = -k_1[\text{A}] + k_{-1}[\text{B}]$$

$$\frac{d[\text{B}]}{dt} = k_1[\text{A}] - k_{-1}[\text{B}] - k_2[\text{B}][\text{C}]$$

$$\frac{d[\text{C}]}{dt} = -k_2[\text{B}][\text{C}]$$

```
sol[k1_, kn1_, k2_, a0_, c0_] := NDSolve[{a'[t] == -k1*a[t] + kn1*b[t], b'[t] == k1*a[t] -
kn1*b[t] - k2*b[t]*c[t], c'[t] == -k2*b[t]*c[t], a[0] == (a0 kn1)/(k1 + kn1), b[0] == (a0
k1)/(k1 + kn1), c[0] == c0}, {a, b, c}, {t, 0, 10000}]
```

```
Export["table.xls", {Table[ Evaluate[c[t] /. sol[0.0001, 1, 10, 0.1, 0.01]], {t, 0, 50000,
10}], Table[ Evaluate[c[t] /. sol[0.0001, 1, 1000, 0.1, 0.01]], {t, 0, 5000, 1}]}]
```

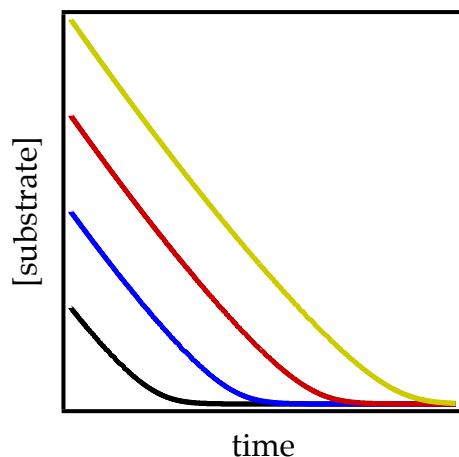

**Figure 5.** Zeroth-order decays at various initial starting concentrations of ArH showing parallel decays and the onset of rate-limiting proton transfer (curvatures) at low ArH concentration.

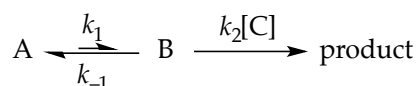

$$\frac{d[A]}{dt} = -k_1[A] + k_{-1}[B]$$

$$\frac{d[B]}{dt} = k_1[A] - k_{-1}[B] - k_2[B][C]$$

$$\frac{d[C]}{dt} = -k_2[B][C]$$

```
sol[k1_, kn1_, k2_, a0_, c0_] := NDSolve[{a'[t] == -k1*a[t] + kn1*b[t], b'[t] == k1*a[t] -
kn1*b[t] - k2*b[t]*c[t], c'[t] == -k2*b[t]*c[t], a[0] == (a0 kn1)/(k1 + kn1), b[0] == (a0
k1)/(k1 + kn1), c[0] == c0}, {a, b, c}, {t, 0, 10000}]
```

```
Export["table.xls", {Table[Evaluate[c[t] /. sol[0.00001, 0.1, 1000, 0.1, 0.001]], {t, 0,
5000, 1}], Table[Evaluate[c[t] /. sol[0.00001, 0.1, 1000, 0.1, 0.002]], {t, 0, 5000, 1}],
Table[Evaluate[c[t] /. sol[0.00001, 0.1, 1000, 0.1, 0.003]], {t, 0, 5000, 1}}]}
```

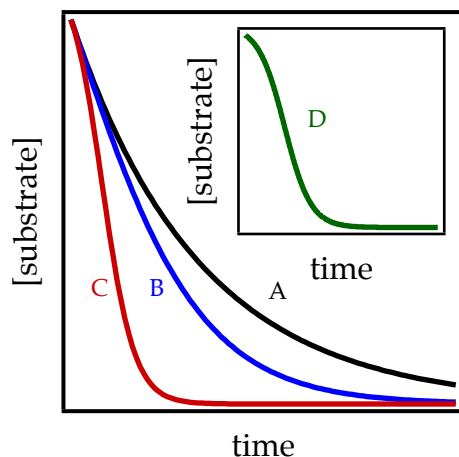

**Figure 8.** Varying degrees of autocatalysis superimposed on first-order decays: curve A, none; curve B, mild; curve C, medium; curve D, strong.

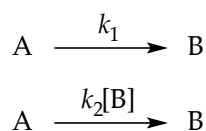

$$\begin{aligned}
 \frac{d[A]}{dt} &= -k_1[A] - k_2[A][B] \\
 \frac{d[B]}{dt} &= k_1[A] + k_2[A][B]
 \end{aligned}$$

```

sol[k1_, k2_, a0_] := NDSolve[{a'[t] == -k1*a[t] - k2*a[t]*b[t], b'[t] == k1*a[t] +
k2*a[t]*b[t], a[0] == a0, b[0] == 0}, {a, b}, {t, 0, 1000}]

```

```

Export["table.xls", {Table[Evaluate[a[t] /. sol[0.1, 0, 0.1]], {t, 0, 60, 0.3}],
Table[Evaluate[a[t] /. sol[0.1, 1, 0.1]], {t, 0, 60, 0.3}], Table[Evaluate[a[t] /. sol[0.1, 5, 0.1]],
{t, 0, 60, 0.3}]}]

```

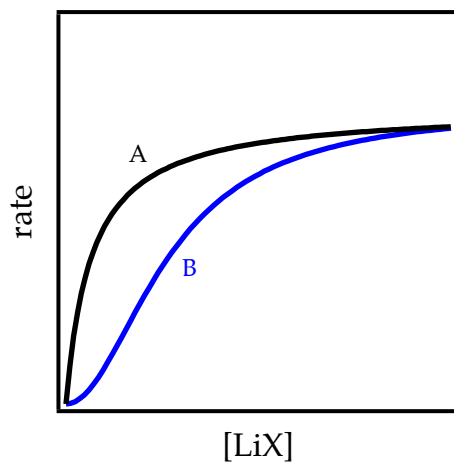

**Figure 9.** Simulation of catalysis showing first-order (curve A) and second-order (curve B) saturation kinetics.

$$\text{rate} = \frac{ax^n}{1 + ax^n}$$

```
Export["table.xls", {Table[1*x^1/(1 + 1*x^1), {x, 0, 10, 0.1}], Table[0.2*x^2/(1 + 0.2*x^2), {x, 0, 10, 0.1}]}]
```

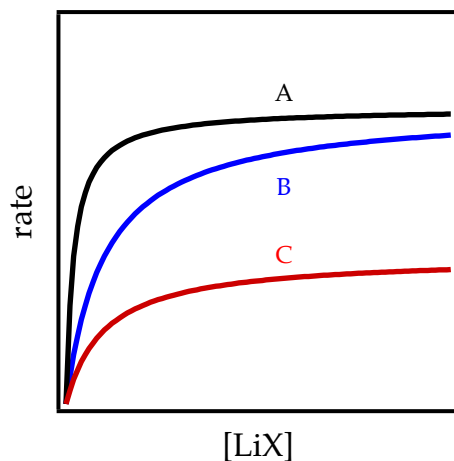

**Figure 10.** Saturation behavior for LiX catalysts. Curve A is a strong catalyst, curve B is a weak catalyst, and curve C corresponds to catalysis with a different deaggregation step than those of curves A and B.

$$\text{rate} = \frac{ax^n}{1+ax^n}$$

```
Export["table.xls", {Table[5*x^1/(1 + 5*x^1), {x, 0, 10, 0.1}], Table[0.2*x^1/(1 + 0.2*x^1), {x, 0, 10, 0.1}], Table[0.5*x^1/(1 + 1*x^1), {x, 0, 10, 0.1}]}]
```



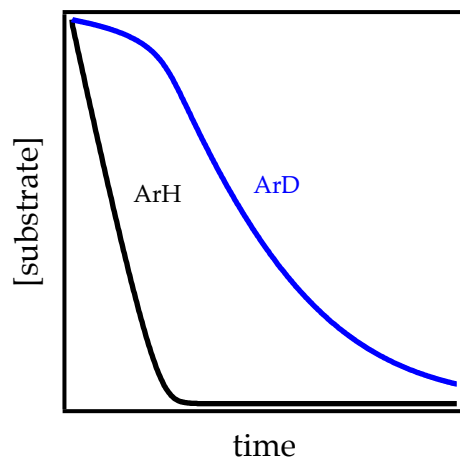

**Figure 11.** Plot showing preferential metalation of ArH over ArD corresponding to  $k_H/k_D = 24$ .

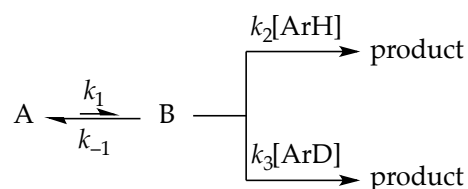

$$\frac{d[A]}{dt} = -k_1[A] + k_{-1}[B]$$

$$\frac{d[B]}{dt} = k_1[A] - k_{-1}[B] - k_2[B][\text{ArH}] - k_3[B][\text{ArD}]$$

$$\frac{d[\text{ArH}]}{dt} = -k_2[B][\text{ArH}]$$

$$\frac{d[\text{ArD}]}{dt} = -k_3[B][\text{ArD}]$$

```

sol[k1_, kn1_, k2_, k3_, a0_, h0_, d0_] := NDSolve[{a'[t] == -k1*a[t] + kn1*b[t], b'[t] ==
k1*a[t] - kn1*b[t] - k2*b[t]*h[t] - k3*b[t]*d[t], h'[t] == -k2*b[t]*h[t], d'[t] == -
k3*b[t]*d[t], a[0] == (a0 kn1)/(k1 + kn1), b[0] == (a0 k1)/(k1 + kn1), h[0] == h0, d[0]
== d0}, {a, b, h, d}, {t, 0, 10000}]

```

```

Manipulate[ Plot[Evaluate[{h[t], d[t]} /. sol[k1, kn1, k2, k3, a0, h0, d0]], {t, 0, 1000}],
{{k1, 0.0001, "k1"}, 0, 1}, {{kn1, 1, "kn1"}, 0, 1}, {{k2, 24000, "k2"}, 0, 1}, {{k3, 1000,
"k3"}, 0, 1}, {{a0, 0.1, "a0"}, 0, 1}, {{h0, 0.001, "h0"}, 0, 1}, {{d0, 0.001, "d0"}, 0, 1}]

```

```

Export["table.xls", Flatten[Table[ Evaluate[{h[t], d[t]} /. sol[0.0001, 1, 24000, 1000,
0.1, 0.001, 0.001]], {t, 0, 2000, 1}], 1]]

```

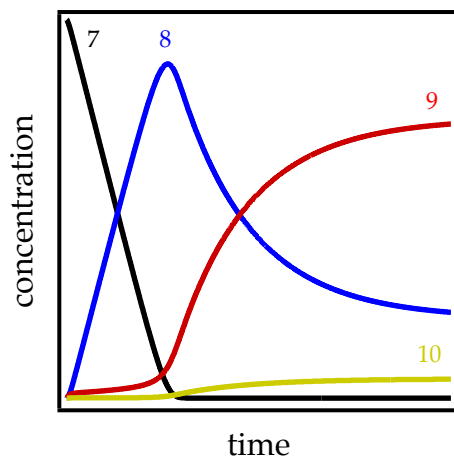

**Figure 17.** Simulated plots of concentration versus time for the reaction of 7 (black trace) with lithium diisopropylamide in tetrahydrofuran at  $-78\text{ }^{\circ}\text{C}$ . The functions derive from a mathematical model based on Scheme 6. xxno label on yellow

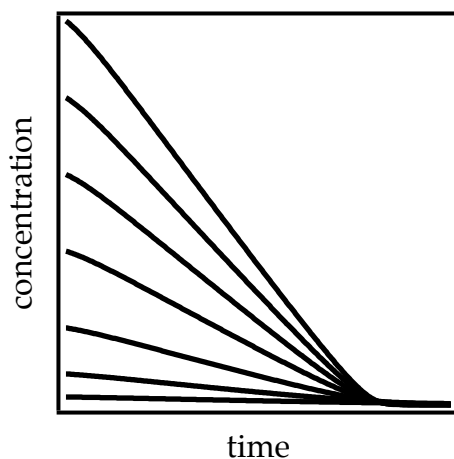

**Figure 18.** Simulations of plots showing concentration versus time for various initial concentrations of carbamate 7. The original manuscript simply displayed independent linear fits.

$$\frac{d[\text{ArH}]}{dt} = -k_1[\text{ArH}][\text{A}_2] - k_3[\text{A}\cdot\text{ArLi}^*][\text{ArH}]$$

$$\frac{d[\text{ArLi}]}{dt} = -k_4[\text{ArLi}][\text{A}_2] + k_{-4}[\text{A}\cdot\text{ArLi}][\text{A}_2]^{0.5} + 2k_3[\text{A}\cdot\text{ArLi}^*][\text{ArH}]$$

$$\frac{d[\text{A}\cdot\text{ArLi}]}{dt} = k_1[\text{ArH}][\text{A}_2] - k_2[\text{A}\cdot\text{ArLi}] + k_{-2}[\text{A}\cdot\text{ArLi}^*] + k_4[\text{ArLi}][\text{A}_2] - k_{-4}[\text{A}\cdot\text{ArLi}][\text{A}_2]^{0.5}$$

$$\frac{d[\text{A}\cdot\text{ArLi}^*]}{dt} = k_2[\text{A}\cdot\text{ArLi}] - k_{-2}[\text{A}\cdot\text{ArLi}^*] - k_3[\text{A}\cdot\text{ArLi}^*][\text{ArH}]$$

$$[\text{A}_2] = \frac{[\text{A}]_0 - [\text{ArLi}] - [\text{A}\cdot\text{ArLi}] - [\text{A}\cdot\text{ArLi}^*]}{2}$$

```

sys[k1_, k2_, kn2_, k3_, k4_, kn4_, a0_, s0_] := NDSolve[{arh[t] == -k1*arh[t]*a2[t] -
k3*aarlis[t]*arh[t], arli'[t] == -k4*arli[t]*a2[t] + kn4*aarli[t]*a2[t]^0.5 +
k3*aarlis[t]*arh[t], aarli'[t] == k1*arh[t]*a2[t] - k2*aarli[t] + kn2*aarlis[t] +
k4*arli[t]*a2[t] - kn4*aarli[t]*a2[t]^0.5, aarlis'[t] == k2*aarli[t] - kn2*aarlis[t] -
k3*aarlis[t]*arh[t], a2[t] == a0/2 - 0.5*arli[t] - aarli[t] - aarlis[t], arh[0] == s0, arli[0] ==
aarli[0] == aarlis[0] == 0}, {arh, arli, aarli, aarlis, a2}, {t, 0, 2000}]

```

```

Manipulate[ Flatten[Table[ Evaluate[ {arh[t], arli[t], aarli[t], aarlis[t]} /. sys[k1, k2,
kn2, k3, k4, kn4, a0, s0]], {t, 0, 2000, 1}], 1], {{k1, 0.020495, "k1"}, 0, 1}, {{k2, 0.09695,
"k2"}, 0, 1}, {{kn2, 1.4131, "kn2"}, 0, 1}, {{k3, 828.12, "k3"}, 0, 1}, {{k4, 0.0461,
"k4"}, 0, 1}, {{kn4, 0.0027294, "k1"}, 0, 1}, {{a0, 0.1, "a0"}, 0, 1}, {{s0, 0.0074, "s0"}, 0,
1}]

```

```

Export["carbamate.xls",«insert table from above»]

```

```

Manipulate[ {Flatten[ Table[Evaluate[ arh[t] /. sys[k1, k2, kn2, k3, k4, kn4, a0, 0.001]],
{t, 0, 200, 0.5}]], Flatten[ Table[Evaluate[ arh[t] /. sys[k1, k2, kn2, k3, k4, kn4, a0,
0.004]], {t, 0, 200, 0.5}]], Flatten[ Table[Evaluate[ arh[t] /. sys[k1, k2, kn2, k3, k4,
kn4, a0, 0.01]], {t, 0, 200, 0.5}]], Flatten[ Table[Evaluate[ arh[t] /. sys[k1, k2, kn2,
k3, k4, kn4, a0, 0.02]], {t, 0, 200, 0.5}]], Flatten[ Table[Evaluate[ arh[t] /. sys[k1,
k2, kn2, k3, k4, kn4, a0, 0.03]], {t, 0, 200, 0.5}]], Flatten[ Table[Evaluate[ arh[t] /.
sys[k1, k2, kn2, k3, k4, kn4, a0, 0.04]], {t, 0, 200, 0.5}]], Flatten[ Table[Evaluate[
arh[t] /. sys[k1, k2, kn2, k3, k4, kn4, a0, 0.05]], {t, 0, 200, 0.5}]]], {{k1, 0.020495,
"k1"}, 0, 1}, {{k2, 0.09695, "k2"}, 0, 1}, {{kn2, 1.4131, "kn2"}, 0, 1}, {{k3, 828.12,
"k3"}, 0, 1}, {{k4, 0.0461, "k4"}, 0, 1}, {{kn4, 0.0027294, "k1"}, 0, 1}, {{a0, 0.5, "a0"},
0, 1}, {{s0, 0.0074, "s0"}, 0, 1}]

```

```

Export["carbamate.xls",«insert table from above»]

```

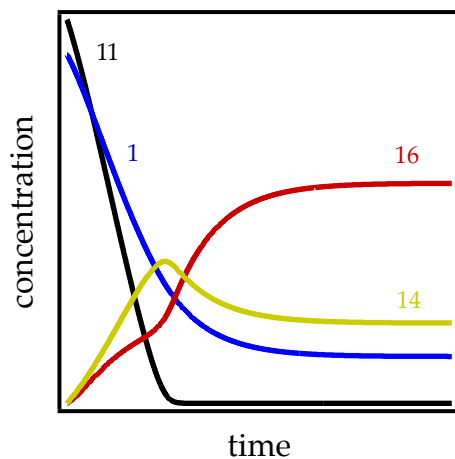

**Figure 19.** Simulated time-dependent concentrations of ester **11**, lithium diisopropylamide dimer **1**, enolate homodimer **14**, and mixed dimer **16**. The functions are from the model described in Scheme 7.

$$\frac{d[\text{ester}]}{dt} = -k_2[A][\text{ester}]$$

$$\frac{d[A_2]}{dt} = -k_1[A_2] + k_{-1}[A]^2 - k_3[A_2][E] + k_{-3}[A_2][AE]$$

$$\frac{d[A]}{dt} = 2k_1[A_2] - 2k_{-1}[A]^2 - k_2[A][\text{ester}] + k_3[A_2][E] - k_{-3}[A][AE] - k_4[A][E] + k_{-4}[AE]$$

$$\frac{d[AE]}{dt} = k_3[A_2][E] - k_{-3}[A][AE] + k_4[A][E] - k_{-4}[AE]$$

$$\frac{d[E]}{dt} = k_2[A][\text{ester}] - k_3[A_2][E] + k_{-3}[A][AE] - k_4[A][E] + k_{-4}[AE] - 2k_5[E]^2 + 2k_{-5}[E_2]$$

$$\frac{d[E_2]}{dt} = k_5[E]^2 - k_{-5}[E_2]$$

```
sol[k1_, kn1_, k2_, k3_, kn3_, k4_, kn4_, k5_, kn5_, a0_, s0_] := NDSolve[{est'[t] == -
k2*a[t]*est[t], a2'[t] == -k1*a2[t] + kn1*a[t]^2 - k3*a2[t]*e[t] + kn3*a[t]*ae[t], a'[t] ==
2 k1*a2[t] - 2 kn1*a[t]^2 - k2*a[t]*est[t] + k3*a2[t]*e[t] - kn3*a[t]*ae[t] - k4*a[t]*e[t] +
kn4*ae[t], ae'[t] == k3*a2[t]*e[t] - kn3*a[t]*ae[t] + k4*a[t]*e[t] - kn4*ae[t], e'[t] ==
k2*a[t]*est[t] - k3*a2[t]*e[t] + kn3*a[t]*ae[t] - k4*a[t]*e[t] + kn4*ae[t] - 2 k5*e[t]^2 + 2
kn5*e2[t], e2'[t] == k5*e[t]^2 - kn5*e2[t], a2[0] == a0/2, est[0] == s0, a[0] == ae[0] ==
e[0] == e2[0] == 0}, {est, a2, a, ae, e, e2}, {t, 0, 20000}]
```

```
Manipulate[ Flatten[Table[ Evaluate[{est[t], a2[t], ae[t], e2[t]} /. sol[k1, kn1, k2, k3,
kn3, k4, kn4, k5, kn5, a0, s0]], {t, 0, 20000, 10}], 1], {{k1, 0.000070944, "k1"}, 0, 1},
{{kn1, 267.46, "kn1"}, 0, 1}, {{k2, 223.44, "k2"}, 0, 1}, {{k3, 0.33594, "k3"}, 0, 1},
{{kn3, 0.84648, "kn3"}, 0, 1}, {{k4, 910.74, "k4"}, 0, 1}, {{kn4, 0.00051948, "k1"}, 0,
1}, {{k5, 451.57, "k5"}, 0, 1}, {{kn5, 0.0080254, "kn5"}, 0, 1}, {{a0, 0.1, "a0"}, 0, 1},
{{s0, 0.055, "s0"}, 0, 1}]
```

```
Export["ester.xls", «insert table from above»]
```

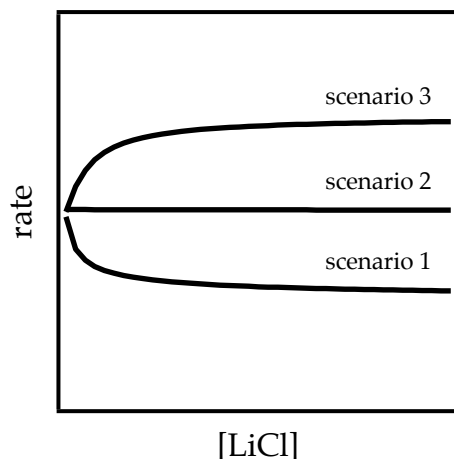

**Figure 22.** Plot of initial rate versus LiCl concentration showing catalyzed inhibition (scenario 1), no change in rate (scenario 2), and catalyzed acceleration (scenario 3).

$$\frac{d[A_2]}{dt} = -k_1[A_2] + k_{-1}[A_2^*] - (k_2 + k_5[\text{LiX}])[A_2] + \left(k_{-2} + \frac{k_5 k_{-2}}{k_2}[\text{LiX}]\right)[A]^2$$

$$\frac{d[A_2^*]}{dt} = k_1[A_2] - k_{-1}[A_2^*] - k_3[A_2^*][S]$$

$$\frac{d[A]}{dt} = 2(k_2 + k_5[\text{LiX}])[A_2] - 2\left(k_{-2} + \frac{k_5 k_{-2}}{k_2}[\text{LiX}]\right)[A]^2 - k_4[A][S] + k_3[A_2^*][S]$$

$$\frac{d[S]}{dt} = -k_3[A_2^*][S] - k_4[A][S]$$

```
sol[k1_, kn1_, k2_, kn2_, k3_, k4_, k5_, a0_, s0_, c_] := NDSolve[{a2'[t] == -(k1) a2[t] + (kn1) a2s[t] - (k2 + k5*c) a2[t]^2 + (kn2 + k5*kn2/k2*c) a[t]^2, a2s'[t] == (k1) a2[t] - (kn1) a2s[t] - k3*a2s[t]*s[t], a'[t] == 2 (k2 + k5*c) a2[t] - 2 (kn2 + k5*kn2/k2*c) a[t]^2 - k4*a[t]*s[t] + k3*a2s[t]*s[t], s'[t] == -k3*a2s[t]*s[t] - k4*a[t]*s[t], a2[0] == ( 4 a0 kn1 + (k2 kn1^2)/(k1 kn2 + kn1 kn2) - ( Sqrt[k2] kn1^(3/2) Sqrt[k2 kn1 + 8 a0 k1 kn2 + 8 a0 kn1 kn2])/( k1 kn2 + kn1 kn2))/(8 (k1 + kn1)), a2s[0] == ( 4 a0 k1 + (k1 k2 kn1)/(k1 kn2 + kn1 kn2) - ( k1 Sqrt[k2] Sqrt[kn1] Sqrt[ k2 kn1 + 8 a0 k1 kn2 + 8 a0 kn1 kn2])/(k1 kn2 + kn1 kn2))/( 8 (k1 + kn1)), a[0] == (-k2 kn1 + Sqrt[k2] Sqrt[kn1] Sqrt[k2 kn1 + 8 a0 k1 kn2 + 8 a0 kn1 kn2])/( 4 (k1 kn2 + kn1 kn2)), s[0] == s0}, {a2, a2s, a, s}, {t, 0, 10000}]
```

```
Manipulate[ Table[-D[Fit[ Table[Evaluate[ Flatten[{t, s[t]} /. sol[k1, kn1, k2, kn2, k3, k4, k5, a0, s0, c]], {t, ti, tf, 10}], {1, x, x^2}, x], x] /. x -> 0, {a0, 0, 0.3, 0.001}], {{k1, 0.0005, "k1"}, 0, 10}, {{kn1, 0.5, "kn1"}, 0, 10}, {{k2, 1.*^-10, "k2"}, 0, 10}, {{kn2, 0.1, "kn2"}, 0, 10}, {{k3, 5, "k3"}, 0, 10}, {{k4, 33, "k4"}, 0, 10}, {{k5, 0.05, "k5"}, 0, 10}, {{a0, 0.3, "a0"}, 0, 1}, {{s0, 0.005, "s0"}, 0, 10}, {{c, 0, "c"}, 0, 0.01}, {{ti, 10, "ti"}, 0, 1000}, {{tf, 200, "tf"}, 0, 1000}]
```

### III. Parallel versus Serial Barrier Order Dependence

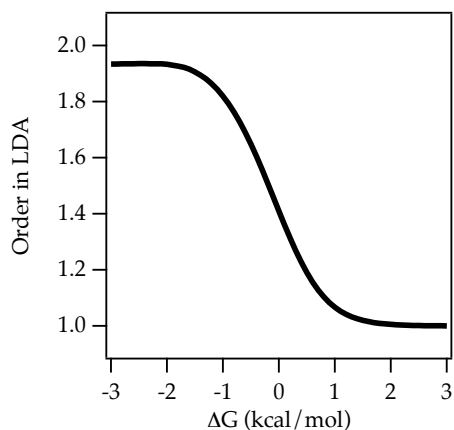

**Figure A.** Order in LDA versus  $\Delta G$  (parallel)

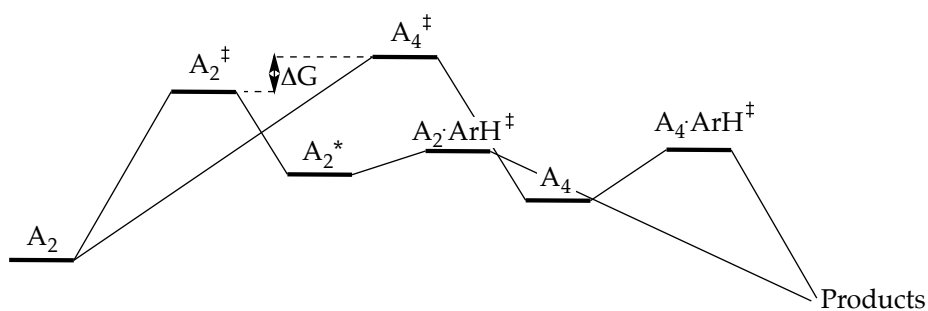

$$\frac{d[A_2]}{dt} = -k_1[A_2] + k_{-1}[A_2^*] - 2k_1k_2[A_2]^2 + 2\frac{k_1k_2}{K}[A_4] + \frac{k_3}{2}[A_2^*][S] + \frac{3k_4}{2}[A_4][S]$$

$$\frac{d[A_2^*]}{dt} = k_1[A_2] - k_{-1}[A_2^*] - k_3[A_2^*][S]$$

$$\frac{d[A_4]}{dt} = k_1k_2[A_2]^2 - \frac{k_1k_2}{K}[A_4] - k_4[A_4][S]$$

$$\frac{d[S]}{dt} = -k_3[A_2^*][S] - k_4[A_4][S]$$

```
Solve[{-k1*a2 + kn1*a2s == 0, -2 k2*k1*a2^2 + 2*k2*k1*a4/Keq == 0, 2 a2 + 2 a2s + 4 a4 == a0}, {a2, a2s, a4}]
```

```
sol2[k1_, kn1_, k2_, Keq_, k3_, k4_, a0_, s0_] := NDSolve[{a2'[t] == -k1*a2[t] + kn1*a2s[t] - 2 k2*k1*a2[t]^2 + 2*k2*k1*a4[t]/Keq + 1/2 k3*a2s[t]*s[t] + 3/2*k4*a4[t]*s[t], a2s'[t] == k1*a2[t] - kn1*a2s[t] - k3*a2s[t]*s[t], a4'[t] == k2*k1*a2[t]^2 - k2*k1*a4[t]/Keq - k4*a4[t]*s[t], s'[t] == -k3*a2s[t]*s[t] - k4*a4[t]*s[t], a2[0] == (-k1 - kn1 + Sqrt[k1^2 + 2 k1 kn1 + kn1^2 + 4 a0 Keq kn1^2])/(4 Keq kn1), a2s[0] == -(k1/Keq) - k1^2/(Keq kn1) + (k1 Sqrt[k1^2 + 2 k1 kn1 + kn1^2 + 4 a0 Keq kn1^2])/(Keq kn1)/(4 kn1), a4[0] == ((2 k1)/Keq + k1^2/(Keq kn1) + 2 a0 kn1 + kn1/Keq - Sqrt[k1^2 + 2 k1 kn1 + kn1^2 + 4 a0 Keq kn1^2])/Keq - (k1 Sqrt[k1^2 + 2 k1 kn1 + kn1^2 + 4 a0 Keq kn1^2])/(Keq kn1)/(8 kn1), s[0] == s0}, {a2, a2s, a4, s}, {t, 0, 10000}]
```

```
Manipulate[{Plot[-s'[1] /. sol2[k1, kn1, Exp[-4186.8 g/(8.314*195.13)], keq1, k3, k4, a0, s0], {a0, 0, 10}], Plot[Evaluate[{s[t]} /. sol2[k1, kn1, Exp[-4186.8 g/(8.314*195.13)], keq1, k3, k4, a0, s0]], {t, 0, 1000}, PlotRange -> {0, 0.01}], {{k1, 0.00001, "k1"}, 0, 10}, {{kn1, 10, "kn1"}, 0, 1000}, {{g, 0, "g"}, -10, 10}, {{keq1, 1.`^-12, "Keq1"}, 0, 1000}, {{k3, 10000, "k3"}, 0, 1000}, {{k4, 1000000000, "k4"}, 0, 1000}, {{a0, 0.1, "a0"}, 0, 1}, {{s0, 0.01, "s0"}, 0, 1}]
```

```
Flatten[Table[{g, a} /. FindFit[Flatten[Table[{10^a0, Log[-s'[0.1]]} /. sol2[0.000001, 1, Exp[-4186.8 g/(8.314*195.13)], 1.`^-12, 10000, 1000000000, 10^(a0), 0.01], {a0, -1, 1, 0.01}], a*Log[x] + b, {a, b}, x], {g, -3, 3, 1}], 0]
```



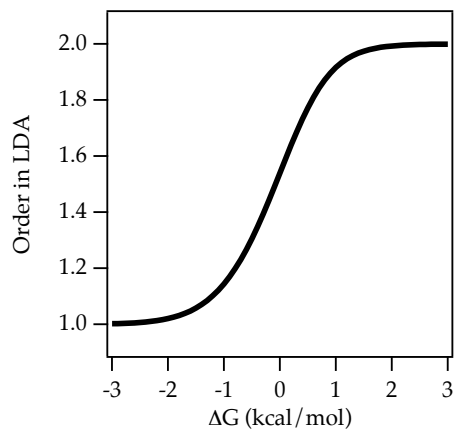

**Figure B.** Order in LDA versus  $\Delta G$  (series)

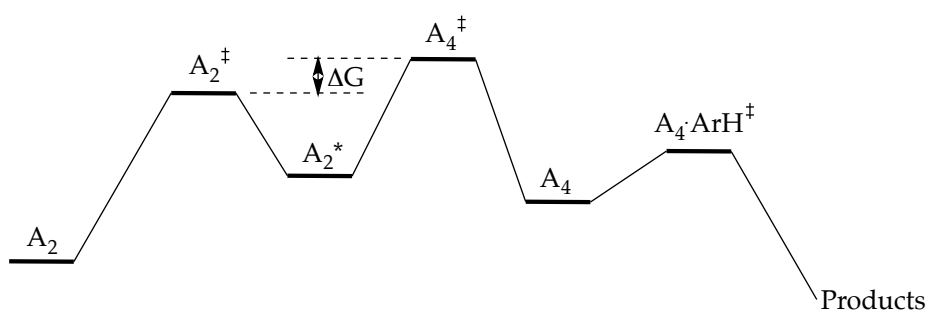

$$\frac{d[A_2]}{dt} = -k_1[A_2] + k_{-1}[A_2^*] - k_{-1}k_2[A_2][A_2^*] + \frac{k_{-1}k_2}{K}[A_4] + \frac{3k_3}{2}[A_4][S]$$

$$\frac{d[A_2^*]}{dt} = k_1[A_2] - k_{-1}[A_2^*] - k_{-1}k_2[A_2][A_2^*] + \frac{k_{-1}k_2}{K}[A_4]$$

$$\frac{d[A_4]}{dt} = k_{-1}k_2[A_2][A_2^*] - \frac{k_{-1}k_2}{K}[A_4] - k_3[A_4][S]$$

$$\frac{d[S]}{dt} = -k_3[A_4][S]$$

Solve[{k1\*a2 - kn1\*a2s == 0, -k2\*kn1\*a2\*a2s + k2\*kn1/Keq1\*a4 == 0, 2 a2 + 2 a2s + 4 a4 == a0}, {a2, a2s, a4}]

sol[k1\_, kn1\_, k2\_, Keq1\_, k3\_, a0\_, s0\_] := NDSolve[{a2'[t] == -k1\*a2[t] + kn1\*a2s[t] - k2\*kn1\*a2[t]\*a2s[t] + k2\*kn1/Keq1\*a4[t] + 3/2\*k3\*a4[t]\*s[t], a2s'[t] == k1\*a2[t] - kn1\*a2s[t] - k2\*kn1\*a2[t]\*a2s[t] + k2\*kn1/Keq1\*a4[t], a4'[t] == k2\*kn1\*a2[t]\*a2s[t] - k2\*kn1/Keq1\*a4[t] - k3\*a4[t]\*s[t], s'[t] == -k3\*a4[t]\*s[t], a2[0] == (-k1 - kn1 + Sqrt[k1^2 + 2 k1 kn1 + 4 a0 k1 Keq1 kn1 + kn1^2])/(4 k1 Keq1), a2s[0] == -(k1/Keq1) - kn1/Keq1 + Sqrt[k1^2 + 2 k1 kn1 + 4 a0 k1 Keq1 kn1 + kn1^2]/Keq1/(4 kn1), a4[0] == 1/(8 kn1) (k1/Keq1 + 2 a0 kn1 + (2 kn1)/Keq1 + kn1^2/(k1 Keq1) - Sqrt[k1^2 + 2 k1 kn1 + 4 a0 k1 Keq1 kn1 + kn1^2]/Keq1 - (kn1 Sqrt[k1^2 + 2 k1 kn1 + 4 a0 k1 Keq1 kn1 + kn1^2])/(k1 Keq1)), s[0] == s0}, {a2, a2s, a4, s}, {t, 0, 10000}]

Manipulate[{Plot[-s'[1] /. sol[k1, kn1, Exp[-4186.8 g/(8.314\*195.13)], keq1, k3, a0, s0], {a0, 0, 10}], Plot[Evaluate[{s[t]} /. sol[k1, kn1, Exp[-4186.8 g/(8.314\*195.13)], keq1, k3, a0, s0]], {t, 0, 1000}, PlotRange -> {0, 0.01}], Flatten[Table[{g, a} /. FindFit[Flatten[Table[Log[-s'[1]] /. sol[k1, kn1, Exp[-4186.8 g/(8.314\*195.13)], keq1, k3, a0, s0], {a0, 0.01, 10, 0.01}]], a\*Log[x] + b, {a, b}, x], {g, -3, 3, 1}, 0]], {{k1, 0.001, "k1"}, 0, 10}, {{kn1, 1000, "kn1"}, 0, 1000}, {{keq1, 1, "Keq1"}, 0, 1000}, {{k3, 1000000000, "k3"}, 0, 1000}, {{a0, 0.1, "a0"}, 0, 1}, {{g, 0, "g"}, -3, 3}, {{s0, 0.01, "s0"}, 0, 1}]

Flatten[Table[{g, a} /. FindFit[Flatten[Table[Log[-s'[1]] /. sol[0.001, 1000, Exp[-4186.8 g/(8.314\*195.13)], 1, 1000000000, a0, 0.01], {a0, 0.01, 10, 0.01}]], a\*Log[x] + b, {a, b}, x], {g, -3, 3, 0.1}], 0]

#### IV. Standard Steady State Treatment of Multiple Barriers in Series

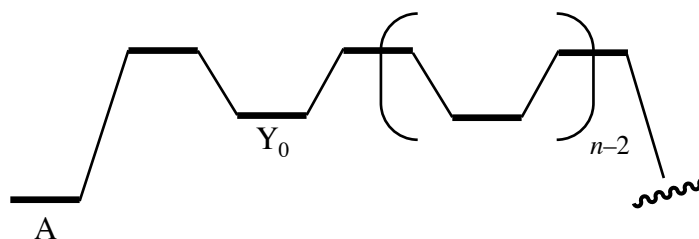

Assume the forward rate constant for conversion of A to  $Y_0$  is  $k_1$  and the reverse rate constant is  $k_{-1}$ . All intermediates  $Y_i$  are of the same energy; otherwise stated, they are pairwise interconverted with rate constant  $k_{-1}$ . The time-varying concentration of  $Y_i$  is:

$$\frac{d[Y_i]}{dt} = k_{-1}[Y_{i-1}] - 2k_{-1}[Y_i] + k_{-1}[Y_{i+1}]$$

Assuming a steady state has been reached  $\frac{d[Y_i]}{dt} = 0$ , and

$$[Y_{i-1}] = 2[Y_i] - [Y_{i+1}] \quad (1a)$$

On shifting the index,

$$[Y_i] = 2[Y_{i+1}] - [Y_{i+2}] \quad (1b)$$

From equation 1b, it follows that  $[Y_{m-1}] = 2[Y_m]$  and generally that

$$[Y_{m-x}] = (x+1)[Y_m] \quad (2)$$

The time-varying concentration of  $Y_0$  is

$$\frac{d[Y_0]}{dt} = k_1[A] - 2k_{-1}[Y_0] + k_{-1}[Y_1]$$

Applying the steady state approximation to the former expression gives

$$[Y_0] = \frac{k_1[A] + k_{-1}[Y_1]}{2k_{-1}} \quad (3)$$

Using equation 1b for  $[Y_0]$  we find  $[Y_0] = 2[Y_1] - [Y_2]$ . Given that  $\frac{[Y_2]}{[Y_1]} = \frac{m-1}{m}$  from

equation 2,  $[Y_0] = 2[Y_1] - \frac{m-1}{m}[Y_1] = \left(2 - \frac{m-1}{m}\right)[Y_1]$ . Therefore,

$$[Y_1] = \frac{[Y_0]}{\left(2 - \frac{m-1}{m}\right)} \quad (4)$$

On combining equations 3 and 4,

$$[Y_0] = \frac{k_1[A] + k_{-1} \left( \frac{[Y_0]}{\left(2 - \frac{m-1}{m}\right)} \right)}{2k_{-1}}$$

Simplification of the above gives

$$\begin{aligned} [Y_0] &= \frac{k_1[A]}{k_{-1}} \left( \frac{1}{2 - \frac{1}{2 - \frac{m-1}{m}}} \right) \\ &= \frac{k_1[A]}{k_{-1}} \left( \frac{m+1}{m+2} \right) \end{aligned}$$

To obtain an expression for the rate of consumption of [A] as a function of relevant rate constants and the number of barriers begin with the rate law for A and employ the preceding result:

$$\begin{aligned} \frac{d[A]}{dt} &= -k_1[A] + k_{-1}[Y_0] \\ &= -k_1[A] + k_{-1} \left( \frac{k_1[A]}{k_{-1}} \left( \frac{m+1}{m+2} \right) \right) \\ &= -k_1 \left( 1 - \frac{m+1}{m+2} \right) [A] \\ &= -k_1 \left( \frac{1}{m+2} \right) [A] \end{aligned}$$

Notice that the number of barriers is  $m+2$ , so we define  $n = m+2$ , and the above expression becomes

$$\frac{d[A]}{dt} = -\frac{k_1}{n} [A] \quad (5)$$

Therefore, the rate of a process that proceeds through  $n$  barriers of equal activation energy relative to the ground state attenuates the rate associated with reactivity through a single such barrier by a factor of  $n$ .

Proof of equation 2:

We want to show that  $[Y_{m-x}] = (x+1)[Y_m]$ , so we provisionally assume that  $[Y_{m-x}] = (x+1)[Y_m]$  and  $[Y_{m-(x-1)}] = x[Y_m]$  are true. From equation 1a, we know that  $[Y_{i-1}] = 2[Y_i] - [Y_{i+1}]$ , so  $[Y_{m-(x+1)}] = 2[Y_{m-x}] - [Y_{m-(x-1)}] = 2(x+1)[Y_m] - x[Y_m] = (x+2)[Y_m]$ , and the proof is complete.

## V. Arbitrary Height Barriers in Series

We want to derive a general expression for the overall rate in terms of the microscopic rate constants and do so paralleling Wagner, *C. Advances in Catalysis*, **1970**, *21*, 323. Consider the scheme depicted below.

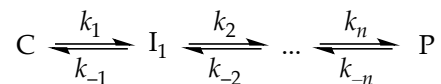

At each step, denote  $K_i = k_i/k_{-i}$ . Assume that a single rate-limiting step exists at position  $m$ , for which all preceding and subsequent steps are at equilibrium. By mass balance,

$$[I_{m-1}]^* = [C] \prod_{i=1}^{m-1} K_i$$

$$[I_m]^* = [P] \prod_{i=m+1}^n K_i^{-1}$$

Given that  $K_{\text{eq}} = \prod_{i=1}^n K_i$ , a rate expression assuming exclusive rate-limitation at position  $m$  follows.

$$\begin{aligned} v_m^* &= k_m \left( [I_{m-1}]^* - \frac{[I_m]^*}{K_m} \right) \\ &= k_m \left( [C] \prod_{i=1}^{m-1} K_i - \frac{[P] \prod_{i=m+1}^n K_i^{-1}}{K_m} \right) \\ &= k_m \prod_{i=1}^{m-1} K_i \left( [C] - [P] \prod_{i=1}^n K_i^{-1} \right) \\ &= k_m \prod_{i=1}^{m-1} K_i \left( [C] - \frac{[P]}{K_{\text{eq}}} \right) \end{aligned}$$

The overall rate at steady state is given by

$$v = v_m = k_m \left( [I_{m-1}] - \frac{[I_m]}{K_m} \right)$$

We are now in a position to relate  $v$  to the various  $v^*$ . Begin by finding the ratio  $\frac{v_m}{v_m^*}$ .

$$\begin{aligned}\frac{v_m}{v_m^*} &= \frac{k_m \left( [I_{m-1}] - \frac{[I_m]}{K_m} \right)}{k_m \prod_{i=1}^{m-1} K_i \left( [C] - \frac{[P]}{K_{eq}} \right)} \\ &= \frac{\prod_{i=1}^{m-1} K_i^{-1} \left( [I_{m-1}] - \frac{[I_m]}{K_m} \right)}{\left( [C] - \frac{[P]}{K_{eq}} \right)}\end{aligned}$$

Sum over all  $\frac{v_m}{v_m^*}$ .

$$\begin{aligned}\sum_{m=1}^n \frac{v_m}{v_m^*} &= \sum_{m=1}^n \frac{\prod_{i=1}^{m-1} K_i^{-1} \left( [I_{m-1}] - \frac{[I_m]}{K_m} \right)}{\left[ C \right] - \frac{[P]}{K_{eq}}} \\ &= \frac{1}{\left[ C \right] - \frac{[P]}{K_{eq}}} \left( \sum_{m=1}^n \prod_{i=1}^{m-1} K_i^{-1} [I_{m-1}] - \sum_{m=1}^n \prod_{i=1}^m K_i^{-1} [I_m] \right) \\ &\quad \text{note that } [I_0] \text{ is } [C] \text{ and } [I_n] \text{ is } [P] \\ &= \frac{1}{\left[ C \right] - \frac{[P]}{K_{eq}}} \left( [C] + \sum_{m=2}^n \prod_{i=1}^{m-1} K_i^{-1} [I_{m-1}] - \sum_{m=1}^{n-1} \prod_{i=1}^m K_i^{-1} [I_m] - \frac{[P]}{K_{eq}} \right) \\ &= \frac{1}{\left[ C \right] - \frac{[P]}{K_{eq}}} \left( [C] + \sum_{m=1}^{n-1} \prod_{i=1}^m K_i^{-1} [I_m] - \sum_{m=1}^{n-1} \prod_{i=1}^m K_i^{-1} [I_m] - \frac{[P]}{K_{eq}} \right) \\ &= \frac{[C] - \frac{[P]}{K_{eq}}}{\left[ C \right] - \frac{[P]}{K_{eq}}} \\ &= 1\end{aligned}$$

With this trivial identity, proceed to find the overall reaction rate.

$$\sum_{m=1}^n \frac{v_m}{v_m^*} = \sum_{m=1}^n \frac{v}{v_m^*} = v \sum_{m=1}^n \frac{1}{v_m^*} = 1$$

Therefore,

$$\begin{aligned}
 v &= \frac{1}{\sum_{m=1}^n \frac{1}{v_m^*}} \\
 &= \frac{1}{\sum_{m=1}^n \frac{1}{k_m \prod_{i=1}^{m-1} K_i \left( [C] - \frac{[P]}{K_{eq}} \right)}} \\
 &= \frac{[C] - \frac{[P]}{K_{eq}}}{\sum_{m=1}^n \frac{1}{k_m \prod_{i=1}^{m-1} K_i}}
 \end{aligned}$$

Under initial rate conditions, assume  $[P] \approx 0$  to give the expression below (equation 32 in the manuscript)

$$-\frac{d[C]}{dt} = \frac{[C]_0}{\sum_{m=1}^n \frac{1}{k_m \prod_{i=1}^{m-1} K_i}}$$

### Particular Cases.

#### 1) *Equivalent–Energy Intermediates*

We examine the case where all intermediates in the conversion of C to P are of equal energy. This means  $1 = K_2 = K_3 = \dots = K_{n-1}$ . Therefore,

$$\begin{aligned}
 -\frac{d[C]}{dt} &= \frac{[C]_0}{\frac{1}{k_1} + \sum_{m=2}^n \frac{1}{k_m K_1}} \\
 &= \frac{k_1 [C]_0}{1 + \frac{k_1}{K_1} \sum_{m=2}^n \frac{1}{k_m}} \\
 &= \frac{k_1 [C]_0}{1 + k_{-1} \sum_{m=2}^n \frac{1}{k_m}}
 \end{aligned}$$



## 2) Equivalent–Energy Intermediates and Barriers of Equal Height

$$\begin{aligned} -\frac{d[C]}{dt} &= \frac{k_1 [C]_0}{1 + k_{-1} \sum_{m=2}^n \frac{1}{k_{-1}}} \\ &= \frac{k_1 [C]_0}{1 + \sum_{m=2}^n 1} \\ &= \frac{k_1 [C]_0}{n} \end{aligned}$$

## 3) Differing Molecularity — Two Barrier Case

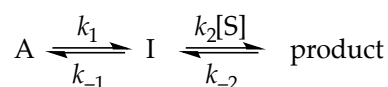

Following the equation described in the previous section,

$$\begin{aligned} \frac{d[\text{product}]}{dt} &= \frac{[A]_0}{\sum_{m=1}^n \frac{1}{k_m \prod_{i=1}^{m-1} K_i}} \\ &= \frac{[A]_0}{\frac{1}{k_1} + \frac{1}{k_2 [S] \left( \frac{k_1}{k_{-1}} \right)}} \\ &= \frac{k_1 k_2 [A]_0 [S]}{k_{-1} + k_2 [S]} \end{aligned}$$

as expected from a standard steady state treatment.

## VI. Full reference 17.

Gaussian 03, Revision B.04, Frisch, M. J.; Trucks, G. W.; Schlegel, H. B.; Scuseria, G. E.; Robb, M. A.; Cheeseman, J. R.; Montgomery, Jr., J. A.; Vreven, T.; Kudin, K. N.; Burant, J. C.; Millam, J. M.; Iyengar, S. S.; Tomasi, J.; Barone, V.; Mennucci, B.; Cossi, M.; Scalmani, G.; Rega, N.; Petersson, G. A.; Nakatsuji, H.; Hada, M.; Ehara, M.; Toyota, K.; Fukuda, R.; Hasegawa, J.; Ishida, M.; Nakajima, T.; Honda, Y.; Kitao, O.; Nakai, H.; Klene, M.; Li, X.; Knox, J. E.; Hratchian, H. P.; Cross, J. B.; Bakken, V.; Adamo, C.; Jaramillo, J.; Gomperts, R.; Stratmann, R. E.; Yazyev, O.; Austin, A. J.; Cammi, R.; Pomelli, C.; Ochterski, J. W.; Ayala, P. Y.; Morokuma, K.; Voth, G. A.; Salvador, P.; Dannenberg, J. J.; Zakrzewski, V. G.; Dapprich, S.; Daniels, A. D.; Strain, M. C.; Farkas, O.; Malick, D. K.; Rabuck, A. D.; Raghavachari, K.; Foresman, J. B.; Ortiz, J. V.; Cui, Q.; Baboul, A. G.; Clifford, S.;

Cioslowski, J.; Stefanov, B. B.; Liu, G.; Liashenko, A.; Piskorz, P.; Komaromi, I.; Martin, R. L.; Fox, D. J.; Keith, T.; Al-Laham, M. A.; Peng, C. Y.; Nanayakkara, A.; Challacombe, M.; Gill, P. M. W.; Johnson, B.; Chen, W.; Wong, M. W.; Gonzalez, C.; and Pople, J. A. Gaussian, Inc., Wallingford CT, 2004.
